# Supplementary material
Source: HighWire-hosted journal article supplement (https://www.canjsurg.ca/highwire/filestream/97314/field_highwire_adjunct_files/0/019419-at-1.pdf)
Supplement: 019419-at-1.pdf [file 019419-at-1.pdf]

DOI: 10.1503/cjs.019419

Online appendices are unedited and posted as supplied by the authors.

## Appendix 1. Supplementary tables

Table S1. Qualitative analysis of the impact of the observership program

a)

| Interest in a surgical career  |        | Factors related to career choice                                           |                                                                                              |                                                                           |                                                                                                                                          |
|--------------------------------|--------|----------------------------------------------------------------------------|----------------------------------------------------------------------------------------------|---------------------------------------------------------------------------|------------------------------------------------------------------------------------------------------------------------------------------|
|                                |        | Lifestyle                                                                  | Type of practice                                                                             | Skills required                                                           | Work environment                                                                                                                         |
| <b>Diminished or no impact</b> | n (%)  | 3 (18.8)                                                                   | 4 (25.0)                                                                                     | 4 (25.0)                                                                  | 2 (12.5)                                                                                                                                 |
|                                | Quote  | “The schedule and work-family balance remains a priority.” (student 124)   | “It was small structures that requires fine work which I’m less interested in.” (student 16) | “I do not believe I am patient enough.” (student 65)                      | “The work conditions.” (student 42)                                                                                                      |
| <b>Increased or confirmed</b>  | n (%)  | 8 (11.8)                                                                   | 22 (32.4)                                                                                    | 4 (5.9)                                                                   | 21 (30.9)                                                                                                                                |
|                                | Quotes | “Being able to talk with the surgeon about her personal life.” (student 5) | “The concrete results of an operation.” (student 113)                                        | “The precision and concentration it requires fascinated me.” (student 25) | “The collaboration between the various professionals (surgeon, anesthesiologist, nurse) is a very stimulating aspect [...]” (student 61) |

n: Number of students

b)

| Interest in a surgical career  |        | Prior perceptions of the surgical field                                                   |                                                          |                                                                                                  |                                                                                        |
|--------------------------------|--------|-------------------------------------------------------------------------------------------|----------------------------------------------------------|--------------------------------------------------------------------------------------------------|----------------------------------------------------------------------------------------|
|                                |        | Pace                                                                                      | Climate                                                  | Patient-doctor relationship                                                                      | Type of practice                                                                       |
| <b>Diminished or no impact</b> | n (%)  | 7 (43.8)                                                                                  | 5 (31.3)                                                 | 1 (6.3)                                                                                          | 11 (68.8)                                                                              |
|                                | Quote  | “Demanding environment.” (student 125)<br>“Quite busy.” (student 16)                      | “Strict expectations towards the students.” (student 16) | “The help relationship that surgery brings.” (student 4)                                         | “I have the impression it is a very stressful environment [...]” (student 106)         |
| <b>Increased or confirmed</b>  | n (%)  | 25 (36.8)                                                                                 | 16 (23.5)                                                | 4 (5.9)                                                                                          | 39 (57.3)                                                                              |
|                                | Quotes | “An expeditious field that requires long hours with little time for breaks.” (student 17) | “Rigor and discipline must reign.” (student 61)          | “Environment which can sometimes focus more on the human body than on the patient.” (student 18) | “Highly stressful environment where people perform under high pressure.” (student 110) |

n: Number of students

DOI: 10.1503/cjs.019419

Online appendices are unedited and posted as supplied by the authors.

c)

| Interest in a surgical career |        | Perceptions of the surgical field after the observership                                                                         |                                                                                                                                           |                                                                                                                                                                   |                                                            |
|-------------------------------|--------|----------------------------------------------------------------------------------------------------------------------------------|-------------------------------------------------------------------------------------------------------------------------------------------|-------------------------------------------------------------------------------------------------------------------------------------------------------------------|------------------------------------------------------------|
|                               |        | Pace                                                                                                                             | Climate                                                                                                                                   | Patient-doctor relationship                                                                                                                                       | Type of practice                                           |
| Diminished or no impact       | n (%)  | 4 (25.0)                                                                                                                         | 1 (6.3)                                                                                                                                   | 1 (6.3)                                                                                                                                                           | 5 (31.3)                                                   |
|                               | Quote  | “It confirmed my impression that surgeons work a lot.” (student 42)                                                              | “I have to admit that I was a bit prejudiced about surgeons, [...] but I loved my day!” (student 135)                                     | “Less ‘intimate’ contacts with the patient.” (student 56)                                                                                                         | “Quite a stressful environment.” (student 106)             |
| Increased or confirmed        | n (%)  | 11 (16.2)                                                                                                                        | 10 (14.7)                                                                                                                                 | 10 (14.7)                                                                                                                                                         | 10 (14.7)                                                  |
|                               | Quotes | “Very demanding indeed, there are time constraints. [However], I believe that a healthy life balance is possible.” (student 107) | “The collegiality and humor I’ve witnessed during my observership allowed me to ease my expectations of the surgical field.” (student 49) | “pleasantly surprised of the proximity of surgeons with their patients. Caring was of the highest importance to establish a trusting relationship.” (student 127) | “Even more diverse practice than I thought.” (student 110) |

n: Number of students

Table S2. Qualitative analysis of student’s appreciation of the observership

a)

| Participant’s objective | n (%)     | Quote                                                                                                                                                       |
|-------------------------|-----------|-------------------------------------------------------------------------------------------------------------------------------------------------------------|
| Intellectual curiosity  | 83 (51.9) | “Discover the surgical field.” (student 65)                                                                                                                 |
| Daily work              | 46 (28.8) | “[Learn about] the lifestyle, patient follow-up, etc., and see a typical day.” (student 10)                                                                 |
| Career choice           | 42 (26.3) | “See if it could be a specialty I would like to work in later.” (student 95)                                                                                |
| Academic purposes       | 31 (19.4) | “Observe surgeries before clerkship to understand the general functioning, and not to be completely disoriented during my surgical clerkship.” (student 18) |

n: Number of students

b)

| Concerns regarding the experience  | n (%)     | Quote                                                                                                               |
|------------------------------------|-----------|---------------------------------------------------------------------------------------------------------------------|
| Lack of knowledge                  | 39 (24.4) | “Not to have sufficient knowledge, to look uninformed, not being intelligent enough to be in surgery.” (student 17) |
| Interaction with the surgical team | 27 (16.9) | “To bother the surgical team.” (student 40)                                                                         |
| Quality of the exposure            | 12 (7.5)  | “Not to be exposed to anything because there are too many residents and clerks present.” (student 76)               |
| Physical response                  | 17 (10.6) | “To faint in the operating room.” (student 28)                                                                      |

n: Number of students
